# Supplementary material for: Face Patch Resting State Networks Link Face Processing to Social Cognition
Source: PubMed Central journal article supplement (PMC4562659; doi:10.1371/journal.pbio.1002245), 2015-09-08

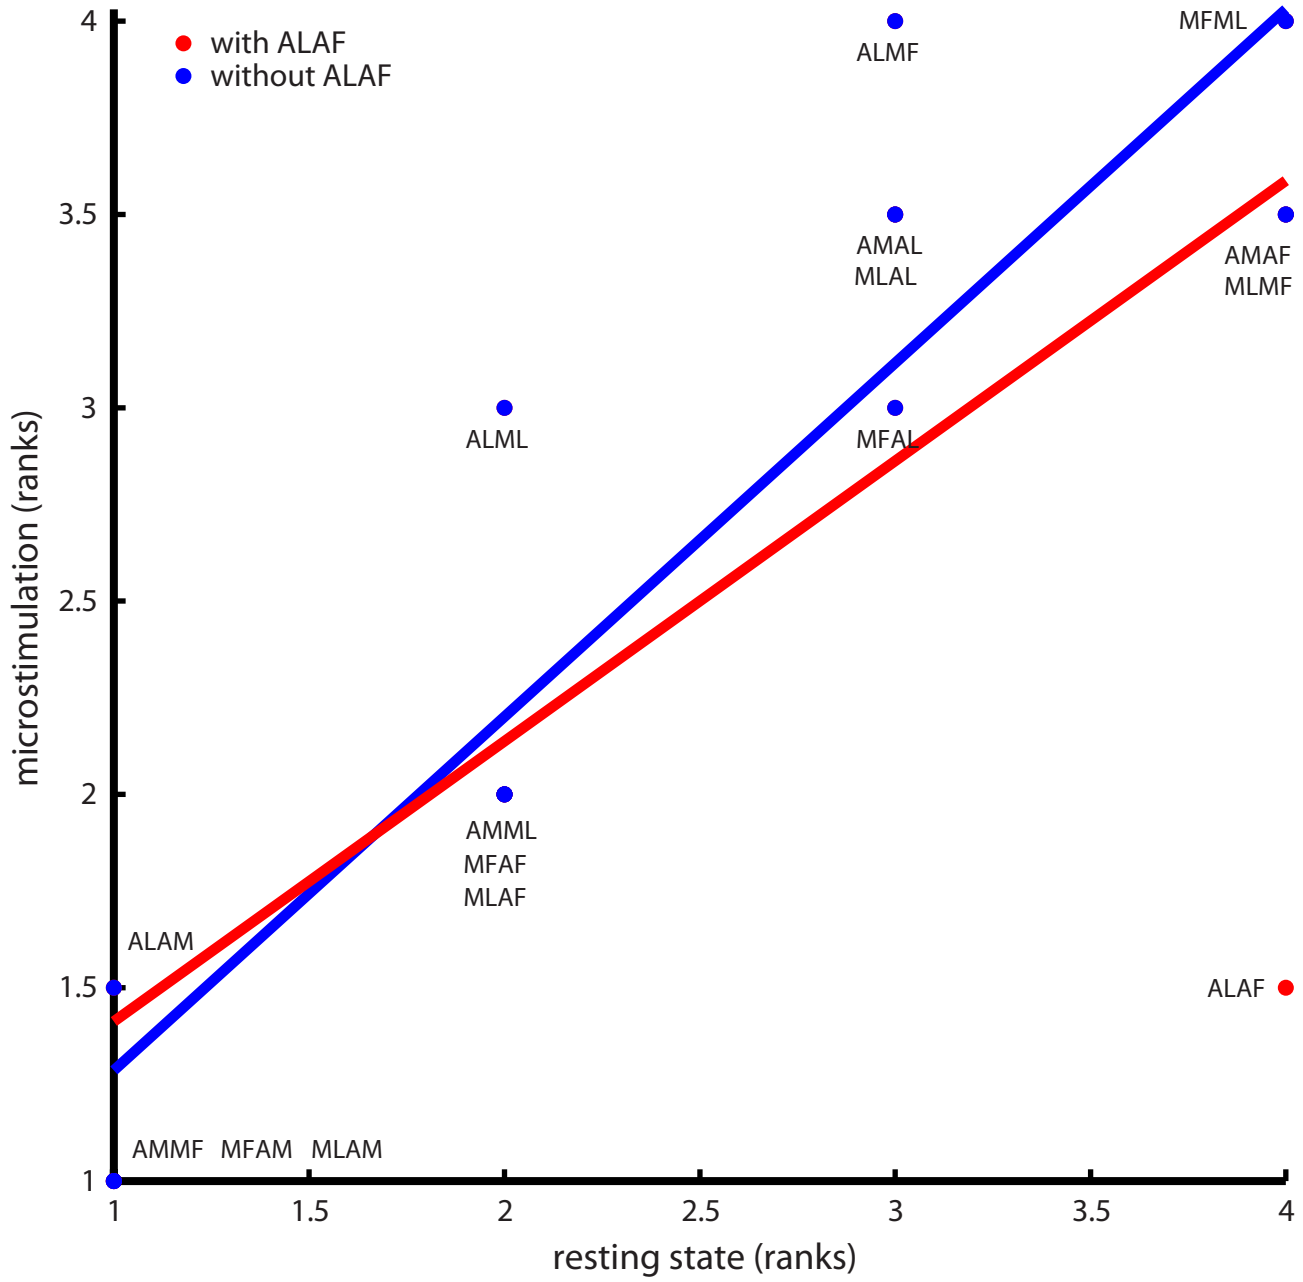

Supplement: pbio.1002245.s001.pdf [file pbio.1002245.s001.pdf]
