# Supplementary material for: Face Patch Resting State Networks Link Face Processing to Social Cognition
Source: PubMed Central journal article supplement (PMC4562659; doi:10.1371/journal.pbio.1002245), 2015-09-08

MF

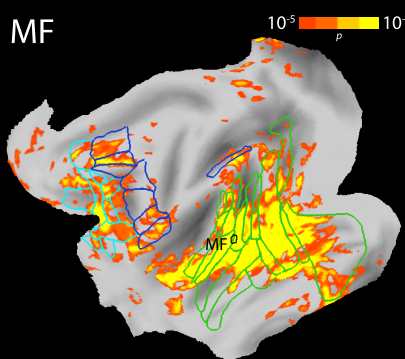

ML

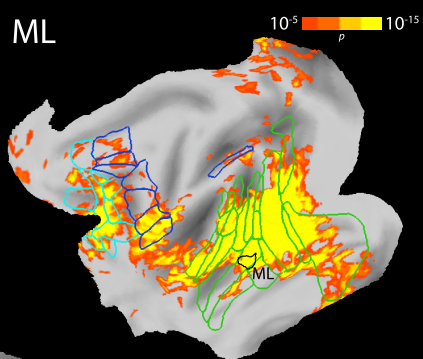

prefrontal  
 premotor-parietal  
 occipito-temporal

AM

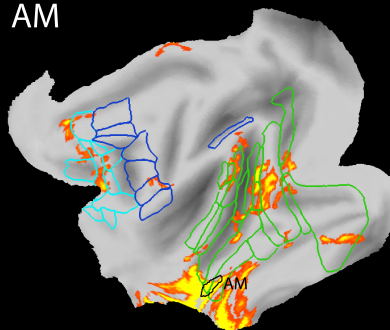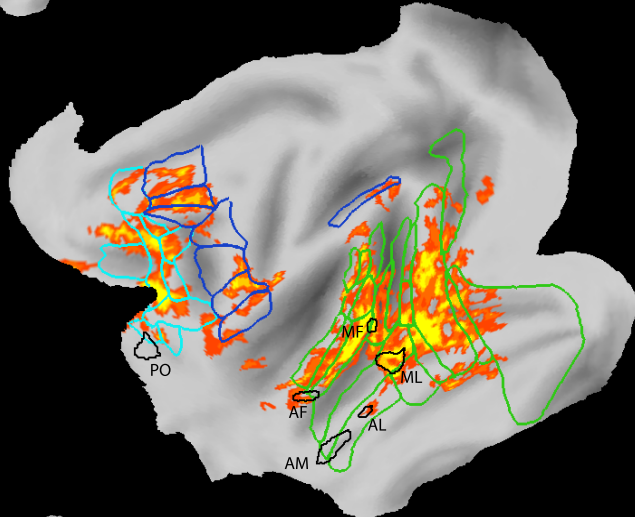

PO

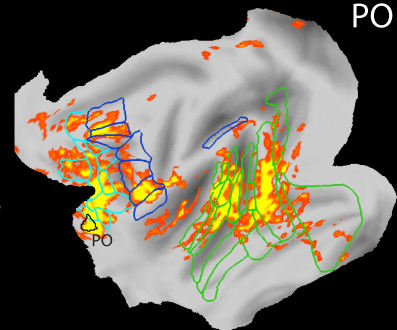

AF

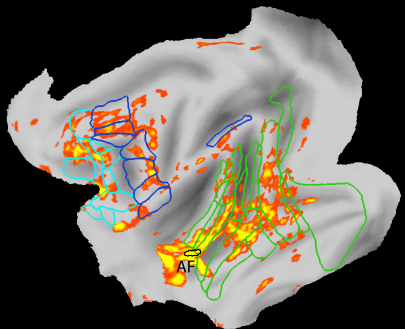

AL

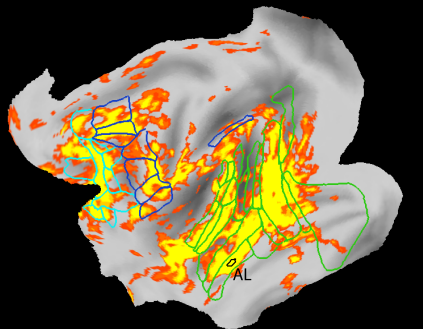

Supplement: pbio.1002245.s003.pdf [file pbio.1002245.s003.pdf]
