# Supplementary material for: Face Patch Resting State Networks Link Face Processing to Social Cognition
Source: PubMed Central journal article supplement (PMC4562659; doi:10.1371/journal.pbio.1002245), 2015-09-08
Supplement: pbio.1002245.s004.pdf [file pbio.1002245.s004.pdf]

■ prefrontal  
■ premotor-parietal  
■ occipito-temporal

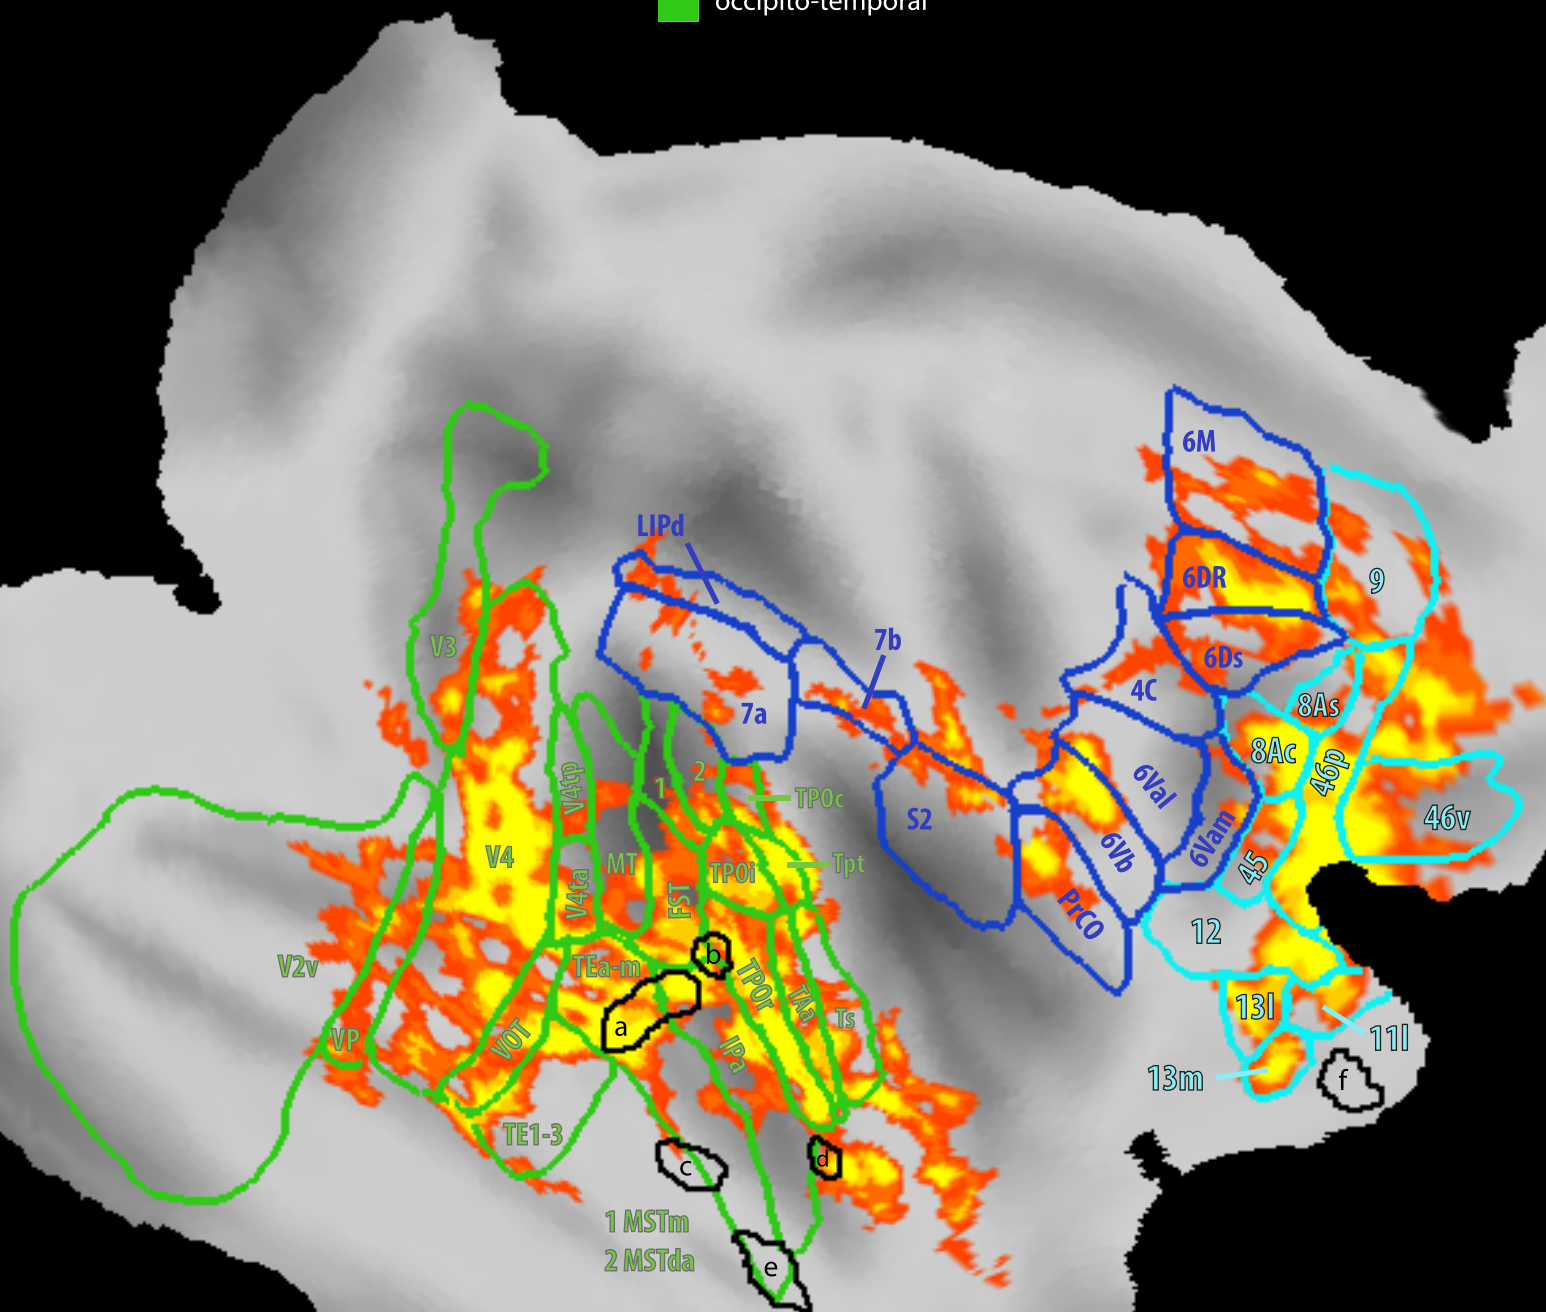

a: ML  
 b: MF  
 c: AL  
 d: AF  
 e: AM  
 f: PO

conjunction  
 $10^{-3}$  ■ ■ ■  $10^{-10}$   
*p*
