# Supplementary material for: Face Patch Resting State Networks Link Face Processing to Social Cognition
Source: PubMed Central journal article supplement (PMC4562659; doi:10.1371/journal.pbio.1002245), 2015-09-08
Supplement: pbio.1002245.s007.pdf [file pbio.1002245.s007.pdf]

prefrontal  
premotor-parietal  
occipito-temporal

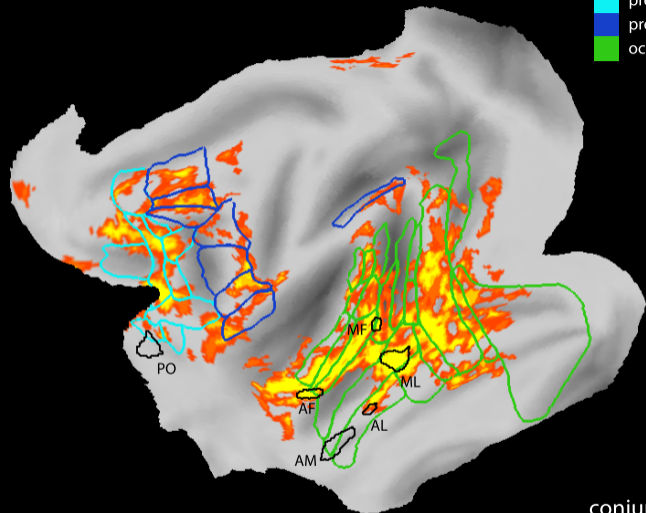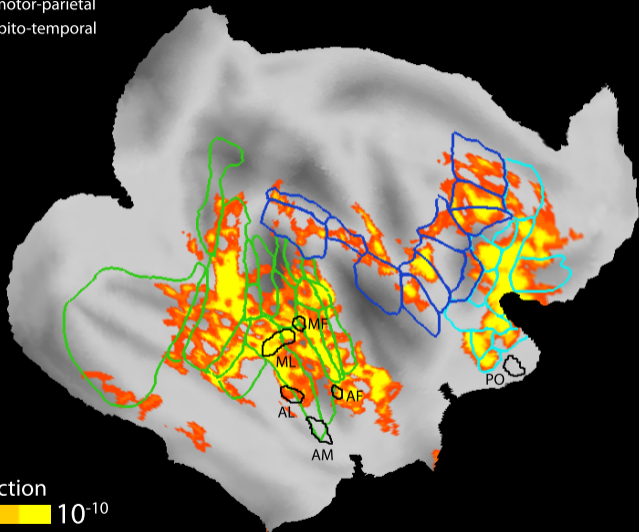

conjunction  
 $10^{-3}$    $10^{-10}$   
 $p$
