# Supplementary material for: Face Patch Resting State Networks Link Face Processing to Social Cognition
Source: PubMed Central journal article supplement (PMC4562659; doi:10.1371/journal.pbio.1002245), 2015-09-08

a) AL, ML, PO > AF, MF

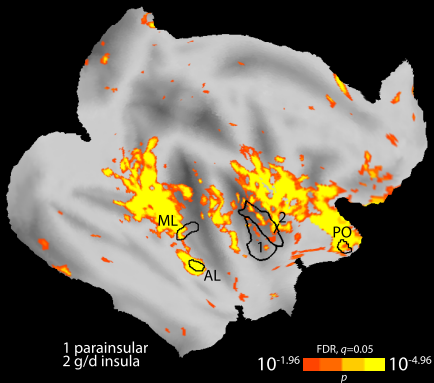

b) AF, AL > MF, ML, PO

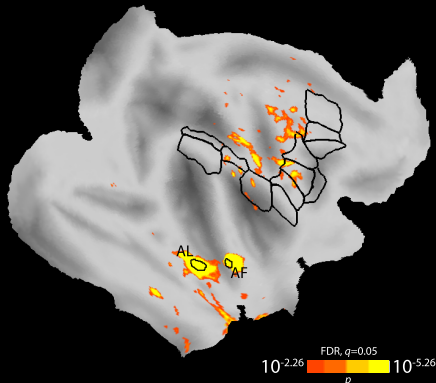

c) AM > AF, AL, MF, ML, PO

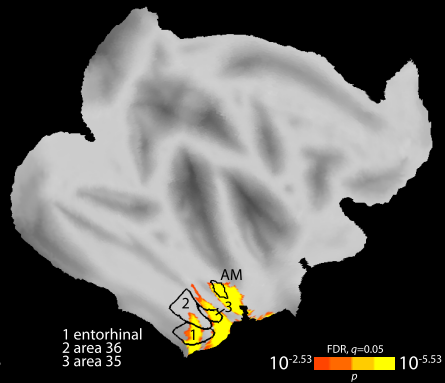

Supplement: pbio.1002245.s009.pdf [file pbio.1002245.s009.pdf]
